# Supplementary material
Source: PubMed Central journal article supplement (PMC3495588)
Supplement: NIHMS408107-supplement-1.pdf [file NIHMS408107-supplement-1.pdf]

## **ONLINE DATA SUPPLEMENT**

### **SALT-SENSITIVITY OF BLOOD PRESSURE IS ASSOCIATED WITH POLYMORPHISMS IN THE SODIUM-BICARBONATE CO-TRANSPORTER**

Robert M. Carey, Cynthia D. Schoeffel, John J. Gildea, John E. Jones, Helen E. McGrath, Lindsay N. Gordon, Min Jeong Park, Rafal Sobota, Patricia C. Underwood, Jonathan Williams, Bei Sun, Benjamin Raby, Jessica Lasky-Su, Paul N. Hopkins, Gail K. Adler, Scott M. Williams, Pedro A. Jose and Robin A. Felder

From the Departments of Medicine (R.M.C., C.D.S.) and Pathology (J.J.G., H.E.M., R.A.F.), University of Virginia School of Medicine, Charlottesville, VA; Division of Nephrology, Department of Medicine (J.E.J., P.A.J.), University of Maryland School of Medicine, Baltimore, MD; the Division of Endocrinology, Diabetes and Hypertension (P.C.U., J.W., B.S., B.R., J.L-S., G.K.A.), Brigham and Women's Hospital, Boston, MA, Department of Medicine (P.N.H.), University of Utah, Salt Lake City, UT and the Center for Human Genetics (L.N.G., M.J.P., R.S., S.M.W.), Department of Molecular Physiology and Biophysics, Vanderbilt University School of Medicine, Nashville, TN.

Correspondence: Dr. Robert M. Carey, P.O. Box 801414, University of Virginia Health System, Charlottesville, VA 22908-1414; telephone: 434-924-5510; fax 434-924-1284; e-mail: [rmc4c@virginia.edu](mailto:rmc4c@virginia.edu).

## Rationale for Candidate Genes Selected for Study

We employed two major criteria to determine the genes to study: (1) genes from genome-wide association study (GWAS) results; and (2) genes that encode proteins known to be involved with sodium homeostasis.

We studied genes other than those reported in GWAS because as Harrap has concluded, “those genetic loci accounted for only about 2% of the genetic factors believed to influence blood pressure” (*J Am Soc Hypertens* 2009;3:231-237).

The association of 30 gene regions encoding known anti-hypertensive drug targets was recently studied. It was found that ADRB1 rs1801253, AGT rs2004776, and ACE rs4305 are associated with blood pressure or hypertension (*Hypertension* 2011;57:903-910). We also studied genes that are in chromosomal loci linked to blood pressure-related phenotypes (e.g., 11p15.4 linked to hypertension in GWAS in the CHARGE and Global BP reports (*J Am Soc Hypertens* 2009;3:231-237), i.e., cholecystokin receptor type B (CCKBR, 11p15.4). Chromosome 4p16 has been linked to hypertension in several studies (*Hypertension* 2001;38:773-778; *Hum Mol Genet* 2006;15:1735-1743); Some genes that express proteins regulating renal sodium transport are in or near this locus, including  $\alpha$ -adducin, G protein-coupled receptor kinase type 4 [GRK4 (4p16.3)], and protein phosphatase [PP2R2C (4p16.1)]. CCKAR (4p15.1) was also studied because sodium-lithium counter transport (SLC) activity, an intermediate phenotype of primary hypertension, has been linked to a region of baboon chromosome 5, homologous to human chromosome 4p (*Am J Hypertens* 2009;22:288-293).

Deletion of dopamine receptor genes in mice (*Curr Hypertens Rep* 2011;13:55-66), e.g., DRD2 (D<sub>2</sub> dopamine receptor) in mice causes salt-sensitive hypertension (*Am J Hypertens* 2003;16:853-858); DRD2 gene variants have been associated with hypertension (*Clin Endocrinol* 2001;55:605-611; *Int J Cardiol* 2005;102:111-116, *J Hum Hypertens* 2001;15:553-558). GRKs are important in the desensitization of G protein-coupled receptors. Some GRK4 gene variants may be associated with salt-sensitivity (*Curr Hypertens Rep* 2011;13:55-66) and sorting nexins may be important in the resensitization of G protein-coupled receptors (*Traffic* 2010;11:508-519). We chose SNX1, SNX5, and SNX19 because they regulate dopamine receptors [*J Clin Hypertens* 2011;13(Suppl 1):A110]; *Hypertension* 2010;56:E123-E123). eNOS G894T has been reported to be associated with hypertension in some studies (*J Hypertens* 2007;25:1763-1774). Caveolin-1 is included because of a study associating caveolin-1 with low blood pressure (*Thromb Haemost* 2006;95:696-701).

SLC4A5 is located in chromosome 2p13. Fasting insulin has been linked to 2p13.2 (*Diabetes* 2007;56:137-142) and insulin resistance is associated with salt-sensitivity (*Nat Rev Cardiol* 2010;7:577-584). Because increased sodium transport is involved in genetic hypertension (*Harvey Lect* 2004-2005;100:71-101) and SLC4A5 is expressed in the nephron (*Am J Physiol Regul Integr Comp Physiol* 2007;293:R2136-2146; *Hum Mol Genet* 2012;21:1025-1036) it made an excellent candidate.

SLC4A5 has also been associated with hypertension (*Hypertension* 2006;47:532-536; *Hypertension* 2004;43:477-482.). The "C" allele of rs8179526 (allele frequency of 0.445) was associated with higher systolic blood pressure (*Biol Res Nurs* 2011 Aug 22. [Epub ahead of print]). In Caucasians, rs6731545 and rs7571842 were significantly associated with resting and sub-maximal exercise pulse pressure (PP) ( $0.0004 < P < 0.0007$  and  $0.002 < P < 0.003$ , respectively). Additionally, rs6731545 was associated with sub-maximal-exercise systolic blood pressure and rate pressure product (both  $P = 0.002$ ) (*Eur J Hum Genet* 2009;17:1481-1489). In these Utah pedigrees, the SLC4A5 gene (SNP hcv1137534) was significantly associated with blood pressure and the association persisted after 10 years of follow-up. These results additionally confirm the involvement of SLC4A5 with blood pressure control, although the mechanism is unclear (*Hypertension* 2006;47:532-536 ). In our studies, rs8179526 (SLC4A5) was significantly associated with systolic blood pressure adjusted for age, and BMI ( $P = .02$ ). Our results relate SLC4A5 to salt-sensitivity, supporting a recent report in which its deletion in mice "induces arterial hypertension and renal metabolic acidosis" (*Hum Mol Genet* 2012;21:1025-1036).

**TABLE S1. HyperPATH Demographic and Clinical Data****A. HyperPATH Demographic Data**

| <b><u>Pre-Study Screen</u></b> | <b><u>HTN</u></b> |
|--------------------------------|-------------------|
| Number of subjects             | 211               |
| Male                           | 129               |
| Female                         | 82                |
| Age (yrs)                      | 49.2±8.4          |
| BMI                            | 26.1±2.4          |
| Systolic BP (mmHg)             | 147.5±19.1        |
| Diastolic BP (mmHg)            | 88.8±12.1         |
| MAP (mmHg)                     | 105.8±13.4        |

**B. HyperPATH Salt-Sensitivity Data**

| <b><u>Baseline</u></b>                    | <b><u>Salt-Sensitive<br/>Subjects</u></b> | <b><u>Salt -Resistant<br/>Subjects</u></b> |
|-------------------------------------------|-------------------------------------------|--------------------------------------------|
| Number of subjects                        | 140                                       | 71                                         |
| Male                                      | 89                                        | 40                                         |
| Female                                    | 51                                        | 31                                         |
| Age (yrs)                                 | 49.8 ± 8.4                                | 48.1± 8.4                                  |
| BMI                                       | 26.1 ± 2.4                                | 26.1 ± 2.6                                 |
| <b><u>After High Salt diet</u></b>        |                                           |                                            |
| Systolic (mmHg)                           | 151.05 ± 17.4                             | 140.4 ± 20.4                               |
| Diastolic (mmHg)                          | 91.9 ± 10.3                               | 82.6 ± 12.9                                |
| MAP (mmHg)                                | 109.0 ± 11.2                              | 96.7 ± 15.3                                |
| Heart Rate (Beats/min)                    | 63.2 ± 10.0                               | 64.1 ± 9.9                                 |
| Plasma Renin Activity<br>(ng/mL/hr)       | 0.55± 0.52                                | 0.88 ± 1.6                                 |
| Plasma Aldosterone (ng/dL)                | 5.4 ± 3.7                                 | 5.6 ± 3.7                                  |
| Urinary Sodium Excretion<br>(mmol/24 hrs) | 228.6 ± 69.2                              | 218.3 ± 69.3                               |
| Total Urine Creatinine<br>(g/24hrs)       | 1.43 ± 0.4                                | 1.44 ±0.4                                  |
| <b><u>After Low Salt diet</u></b>         |                                           |                                            |
| Systolic (mmHg)                           | 128.4 ± 14.9                              | 137.8 ± 19.2                               |
| Diastolic (mmHg)                          | 78.1 ± 10.8                               | 82.4 ± 11.9                                |
| MAP (mmHg)                                | 94.5 ± 11.6                               | 95.7 ±15.6                                 |
| Heart Rate (Beats/min)                    | 64.5 ±10.1                                | 64.8 ±8.9                                  |
| Plasma Renin Activity<br>(ng/mL/hr)       | 3.1 ± 8.0                                 | 2.7 ± 1.8                                  |
| Plasma Aldosterone (ng/dL)                | 17.4 ± 10.5                               | 18.4 ± 17.0                                |
| Urinary Sodium Excretion<br>(mmol/24 hrs) | 13.5 ±7.9                                 | 13.4 ±8.4                                  |

**TABLE S2. Distribution of Genotypes in Hypertensive and Normotensive Subjects in the UVA Cohort**

| <u>Gene</u>     | <u>SNP</u> |     | <u>Genotypes</u> |                   |                    | <u>MAF</u> | <u>HWE</u> |
|-----------------|------------|-----|------------------|-------------------|--------------------|------------|------------|
|                 |            |     |                  |                   |                    |            |            |
| CYP11 $\beta$ 2 | rs1799998  |     | <b>CC</b>        | <b>CT</b>         | <b>TT</b>          |            |            |
|                 |            | HT  | 6                | 24                | 15                 | 0.4000     | 0.6473     |
|                 |            | NT  | 26               | 57                | 29                 | 0.4866     | 0.8645     |
| ADD             | rs4961     |     | <b>GG</b>        | <b>GT</b>         | <b>TT</b>          |            |            |
|                 |            | HT  | 34               | 12                | 0                  | 0.1304     | 0.2560     |
|                 |            | NT  | 61               | 44                | 6                  | 0.2523     | 1.000      |
|                 | rs1541582  |     | <b>AA</b>        | <b>AT</b>         | <b>TT</b>          |            |            |
|                 |            | HT  | 26               | 14                | 4                  | 0.2500     | 1.000      |
|                 | NT         | 62  | 41               | 4                 | 0.2290             | 1.000      |            |
| AGT             | rs699      |     | <b>CC</b>        | <b>TC</b>         | <b>TT</b>          |            |            |
|                 |            | HT  | 8                | 20                | 19                 | 0.3830     | 0.2042     |
|                 |            | NT  | 20               | 43                | 49                 | 0.8850     | 0.1429     |
| AGTR1           | rs5186     |     | <b>AA</b>        | <b>CA</b>         | <b>CC</b>          |            |            |
|                 |            | HT  | 12               | 27                | 5                  | 0.4205     | 1.000      |
|                 |            | NT  | 49               | 50                | 12                 | 0.3333     | 0.4496     |
| ACE             | rs1799752  |     | <b>long long</b> | <b>long short</b> | <b>short short</b> |            |            |
|                 |            | HT  | 5                | 31                | 10                 | 0.4457     | 0.619      |
|                 |            | NT  | 20               | 59                | 33                 | 0.4420     | 0.06182    |
| CAV             | rs3807990  |     | <b>CC</b>        | <b>CT</b>         | <b>TT</b>          |            |            |
|                 |            | HT  | 25               | 17                | 2                  | 0.2386     | 1.000      |
|                 |            | NT  | 63               | 37                | 6                  | 0.2311     | 0.7967     |
|                 | rs3840634  |     | <b>Del Del</b>   | <b>Ins Del</b>    | <b>Ins Ins</b>     |            |            |
|                 |            | HT  | 2                | 17                | 24                 | 0.2442     | 0.3710     |
|                 | NT         | 2   | 35               | 70                | 0.1822             | 0.2821     |            |
| CCKAR           | rs41267457 |     | <b>GG</b>        | <b>GA</b>         | <b>AA</b>          |            |            |
|                 |            | HT  | 46               | 1                 | 0                  | 0.0213     | 1.000      |
|                 |            | NT  | 112              | 2                 | 0                  | 0.0175     | 1.000      |
| CCKBR           | rs1805000  |     | <b>CC</b>        | <b>CT</b>         | <b>TT</b>          |            |            |
|                 |            | HT  | 44               | 2                 | 0                  | 0.0217     | 1.000      |
|                 |            | NT  | 110              | 0                 | 1                  | 0.0090     | 0.01099    |
|                 | rs1805002  |     | <b>GG</b>        | <b>GA</b>         | <b>AA</b>          |            |            |
|                 |            | HT  | 43               | 4                 | 0                  | 0.0851     | 1.000      |
|                 | NT         | 104 | 9                | 0                 | 0.0398             | 1.000      |            |
| CYP4A11         | rs1126742  |     | <b>TT</b>        | <b>CT</b>         | <b>CC</b>          |            |            |
|                 |            | HT  | 34               | 9                 | 2                  | 0.1444     | 1.000      |
|                 |            | NT  | 76               | 35                | 2                  | 0.1726     | 1.000      |
| DRD2            | rs1799732  |     | <b>Del Del</b>   | <b>Ins Del</b>    | <b>Ins Ins</b>     |            |            |

|         |            |     |           |           |           |        |        |
|---------|------------|-----|-----------|-----------|-----------|--------|--------|
|         |            | HT  | 1         | 8         | 37        | 0.1087 | 0.1518 |
|         |            | NT  | 0         | 15        | 93        | 0.0694 | 1.000  |
|         | rs1800497  |     | <b>CC</b> | <b>TC</b> | <b>TT</b> |        |        |
|         |            | HT  | 28        | 16        | 2         | 0.2174 | 1.000  |
|         |            | NT  | 62        | 40        | 8         | 0.2545 | 0.8254 |
|         | rs1079597  |     | <b>AA</b> | <b>GA</b> | <b>GG</b> |        |        |
|         |            | HT  | 1         | 13        | 33        | 0.1596 | 1.000  |
|         |            | NT  | 6         | 37        | 69        | 0.2188 | 0.8025 |
|         | rs6276     |     | <b>AA</b> | <b>AG</b> | <b>GG</b> |        |        |
|         |            | HT  | 25        | 17        | 4         | 0.2717 | 1.000  |
|         |            | NT  | 54        | 45        | 10        | 0.2982 | 0.5367 |
| GRK4    | rs2960306  |     | <b>GG</b> | <b>GT</b> | <b>TT</b> |        |        |
|         |            | HT  | 26        | 19        | 10        | 0.3545 | 0.5394 |
|         |            | NT  | 46        | 62        | 22        | 0.227  | 0.2571 |
|         | rs1024323  |     | <b>CC</b> | <b>CT</b> | <b>TT</b> |        |        |
|         |            | HT  | 24        | 22        | 9         | 0.3636 | 0.2889 |
|         |            | NT  | 45        | 62        | 23        | 0.4154 | 0.4196 |
|         | rs1801058  |     | <b>CC</b> | <b>CT</b> | <b>TT</b> |        |        |
|         |            | HT  | 26        | 19        | 10        | 0.3545 | 0.6353 |
|         | NT         | 34  | 67        | 29        | 0.4808    | 0.6361 |        |
| eNOS    | rs1799983  |     | <b>GG</b> | <b>TG</b> | <b>TT</b> |        |        |
|         |            | HT  | 22        | 17        | 5         | 0.3068 | 0.6478 |
|         |            | NT  | 46        | 55        | 8         | 0.3257 | 0.2353 |
| PPP2R2C | rs35368770 |     | <b>GG</b> | <b>GA</b> | <b>AA</b> |        |        |
|         |            | HT  | 46        | 1         | 0         | 0.0213 | 1.000  |
|         |            | NT  | 109       | 1         | 0         | 0.0091 | 1.000  |
|         | rs35410672 |     | <b>CC</b> | <b>CT</b> | <b>TT</b> |        |        |
|         |            | HT  | 46        | 0         | 0         | 0      | 1.000  |
|         |            | NT  | 111       | 2         | 0         | 0.0177 | 1.000  |
|         | rs3796403  |     | <b>AA</b> | <b>GA</b> | <b>GG</b> |        |        |
|         |            | HT  | 10        | 29        | 6         | 0.4556 | 0.3556 |
|         |            | NT  | 37        | 56        | 17        | 0.4091 | 0.2939 |
|         | rs11545013 |     | <b>CC</b> | <b>AC</b> | <b>AA</b> |        |        |
|         | HT         | 47  | 0         | 0         | 0         | 1.000  |        |
|         | NT         | 110 | 1         | 0         | 0.0090    | 0.1418 |        |
| SLC4A5  | rs7571842  |     | <b>AA</b> | <b>GA</b> | <b>GG</b> |        |        |
|         |            | HT  | 14        | 21        | 12        | 0.4787 | 1.000  |
|         |            | NT  | 34        | 55        | 24        | 0.4558 | 0.4952 |
|         | rs10177833 |     | <b>AA</b> | <b>AC</b> | <b>CC</b> |        |        |
|         |            | HT  | 12        | 21        | 9         | 0.5357 | 0.3428 |
|         | NT         | 34  | 55        | 19        | 0.4306    | 1.000  |        |
| SNX1    | rs1130604  |     | <b>CC</b> | <b>TC</b> | <b>TT</b> |        |        |
|         |            | HT  | 45        | 2         | 0         | 0.0426 | 1.000  |
|         |            | NT  | 112       | 1         | 0         | 0.0088 | 1.000  |
|         | rs1802376  |     | <b>GG</b> | <b>GA</b> | <b>AA</b> |        |        |

|       |            |    |                |                |                |        |         |
|-------|------------|----|----------------|----------------|----------------|--------|---------|
|       |            | HT | 45             | 2              | 0              | 0.0426 | 1.000   |
|       |            | NT | 111            | 2              | 0              | 0.0177 | 1.000   |
|       | rs34910981 |    | <b>del del</b> | <b>ins del</b> | <b>ins ins</b> |        |         |
|       |            | HT | 44             | 2              | 0              | 0.0435 | 1.000   |
|       |            | NT | 109            | 2              | 0              | 0.0180 | 1.000   |
| SNX5  | rs6045116  |    | <b>GG</b>      | <b>GA</b>      | <b>AA</b>      |        |         |
|       |            | HT | 37             | 0              | 0              | 0      | 1.000   |
|       |            | NT | 119            | 1              | 0              | 0.0042 | 1.000   |
| SNX19 | rs3751037  |    | <b>CC</b>      | <b>GC</b>      | <b>GG</b>      |        |         |
|       |            | HT | 27             | 17             | 2              | 0.2283 | 0.5484  |
|       |            | NT | 52             | 45             | 11             | 0.3102 | 0.6809  |
|       | rs3190345  |    | <b>AA</b>      | <b>GA</b>      | <b>GG</b>      |        |         |
|       |            | HT | 30             | 13             | 4              | 0.2234 | 0.3497  |
|       |            | NT | 64             | 37             | 11             | 0.2634 | 0.06756 |
|       | rs681982   |    | <b>AA</b>      | <b>AC</b>      | <b>CC</b>      |        |         |
|       |            | HT | 44             | 2              | 0              | 0.0435 | 1.000   |
|       |            | NT | 108            | 2              | 0              | 0.0182 | 1.000   |
|       | rs4414223  |    | <b>CC</b>      | <b>TC</b>      | <b>TT</b>      |        |         |
|       |            | HT | 21             | 22             | 1              | 0.2727 | 1.000   |
|       |            | NT | 36             | 48             | 16             | 0.4000 | 0.7043  |
|       | rs2298566  |    | <b>AA</b>      | <b>AC</b>      | <b>CC</b>      |        |         |
|       |            | HT | 1              | 19             | 25             | 0.2333 | 0.1188  |
|       | NT         | 7  | 50             | 50             | 0.2991         | 0.5130 |         |

**TABLE S3. Distribution of Genotypes in Salt-Sensitive and Salt Resistant Subjects in the UVA Cohort**

| Gene            | SNP       |    | Genotypes |           |           | MAF    | HWE    |
|-----------------|-----------|----|-----------|-----------|-----------|--------|--------|
|                 |           |    |           |           |           |        |        |
| CYP11 $\beta$ 2 | rs1799998 |    | <b>CC</b> | <b>CT</b> | <b>TT</b> |        |        |
|                 |           | SS | 9         | 17        | 5         | 0.4355 | 0.5207 |
|                 |           | SR | 35        | 64        | 27        | 0.4683 | 0.8225 |
| ADD1            | rs4961    |    | <b>GG</b> | <b>GT</b> | <b>TT</b> |        |        |
|                 |           | SS | 21        | 10        | 0         | 0.1613 | 0.2909 |
|                 |           | SR | 74        | 52        | 0         | 0.2063 | 0.252  |
|                 | rs1541582 |    | <b>AA</b> | <b>AT</b> | <b>TT</b> |        |        |

|         |            |        |                  |                   |                    |           |          |
|---------|------------|--------|------------------|-------------------|--------------------|-----------|----------|
|         |            | SS     | 21               | 8                 | 1                  | 0.1667    | 1.000    |
|         |            | SR     | 67               | 47                | 7                  | 0.2521    | 0.7401   |
| AGT     | rs699      |        | <b>CC</b>        | <b>TC</b>         | <b>TT</b>          |           |          |
|         |            | SS     | 10               | 13                | 7                  | 0.4500    | 0.495    |
|         |            | SR     | 58               | 50                | 21                 | 0.3566    | 0.07772  |
| AGTR1   | rs5186     |        | <b>AA</b>        | <b>CA</b>         | <b>CC</b>          |           |          |
|         |            | SS     | 13               | 16                | 2                  | 0.3226    | 0.4357   |
|         |            | SR     | 48               | 61                | 15                 | 0.3669    | 0.5122   |
| ACE     | rs1799752  |        | <b>long long</b> | <b>long short</b> | <b>short short</b> |           |          |
|         |            | SS     | 6                | 20                | 5                  | 0.4839    | 0.1044   |
|         |            | SR     | 37               | 70                | 20                 | 0.4331    | 0.1675   |
| CAV     | rs3807990  |        | <b>CC</b>        | <b>CT</b>         | <b>TT</b>          |           |          |
|         |            | SS     | 15               | 12                | 2                  | 0.2759    | 1.000    |
|         |            | SR     | 73               | 42                | 6                  | 0.2231    | 0.9896   |
|         | rs3840634  |        | <b>del del</b>   | <b>ins del</b>    | <b>ins ins</b>     |           |          |
|         |            | SS     | 17               | 12                | 0                  | 0.2069    | 0.3043   |
|         |            | SR     | 77               | 44                | 0                  | 0.1818    | 1.000    |
| CCKAR   | rs41267457 |        | <b>GG</b>        | <b>GA</b>         | <b>AA</b>          |           |          |
|         |            | SS     | 30               | 1                 | 0                  | 0.0161    | 1.000    |
|         |            | SR     | 128              | 2                 | 0                  | 0.0077    | 1.000    |
| CCKBR   | rs1805000  |        | <b>CC</b>        | <b>CT</b>         | <b>TT</b>          |           |          |
|         |            | SS     | 30               | 0                 | 0                  | 0.000     | 1.000    |
|         |            | SR     | 124              | 2                 | 0                  | 0.0080    | 0.02367  |
|         | rs1805002  |        | <b>GG</b>        | <b>GA</b>         | <b>AA</b>          |           |          |
|         |            | SS     | 27               | 4                 | 0                  | 0.0645    | 1.000    |
|         |            | SR     | 120              | 9                 | 0                  | 0.0349    | 1.000    |
| CYP4A11 | rs1126742  |        | <b>TT</b>        | <b>CT</b>         | <b>CC</b>          |           |          |
|         |            | SS     | 22               | 9                 | 0                  | 0.1452    | 1.000    |
|         |            | SR     | 88               | 39                | 0                  | 0.1535    | 1.000    |
| DRD2    | rs1799732  |        | <b>del del</b>   | <b>ins del</b>    | <b>ins ins</b>     |           |          |
|         |            | SS     | 22               | 5                 | 0                  | 0.0926    | 1.000    |
|         |            | SR     | 108              | 19                | 0                  | 0.0748    | 0.5557   |
|         | rs1800497  |        | <b>CC</b>        | <b>TC</b>         | <b>TT</b>          |           |          |
|         |            | SS     | 18               | 8                 | 3                  | 0.2414    | 0.2979   |
|         |            | SR     | 72               | 48                | 7                  | 0.2441    | 0.7851   |
|         | rs1079597  |        | <b>AA</b>        | <b>GA</b>         | <b>GG</b>          |           |          |
|         |            | SS     | 20               | 10                | 1                  | 0.1935    | 1.000    |
|         |            | SR     | 82               | 40                | 6                  | 0.2031    | 0.6947   |
|         |            | rs6276 |                  | <b>AA</b>         | <b>AG</b>          | <b>GG</b> |          |
|         | SS         | 10     | 18               | 1                 | 0.3448             | 0.09623   |          |
|         |            | SR     | 69               | 44                | 13                 | 0.2778    | 0.1455   |
| GRK4    | rs2960306  |        | <b>GG</b>        | <b>GT</b>         | <b>TT</b>          |           |          |
|         |            | SS     | 16               | 8                 | 10                 | 0.4118    | 0.002711 |
|         |            | SR     | 56               | 73                | 22                 | 0.3874    | 0.8199   |



|         |            |     |                |                |                |        |        |
|---------|------------|-----|----------------|----------------|----------------|--------|--------|
|         | rs1024323  |     | <b>CC</b>      | <b>CT</b>      | <b>TT</b>      |        |        |
|         |            | SS  | 14             | 12             | 8              | 0.4118 | 0.1135 |
|         |            | SR  | 55             | 72             | 24             | 0.3974 | 0.9569 |
|         | rs1801058  |     | <b>CC</b>      | <b>CT</b>      | <b>TT</b>      |        |        |
|         |            | SS  | 13             | 14             | 7              | 0.4118 | 0.3818 |
|         |            | SR  | 47             | 72             | 32             | 0.4503 | 0.6506 |
| eNOS    | rs1799983  |     | <b>GG</b>      | <b>TG</b>      | <b>TT</b>      |        |        |
|         |            | SS  | 13             | 12             | 5              | 0.3667 | 0.4485 |
|         |            | SR  | 55             | 60             | 8              | 0.3089 | 0.1142 |
| PPP2R2C | rs35368770 |     | <b>GG</b>      | <b>GA</b>      | <b>AA</b>      |        |        |
|         |            | SS  | 31             | 0              | 0              | 0.000  | 1.000  |
|         |            | SR  | 124            | 2              | 0              | 0.0080 | 1.000  |
|         | rs35410672 |     | <b>CC</b>      | <b>CT</b>      | <b>TT</b>      |        |        |
|         |            | SS  | 31             | 0              | 0              | 0.000  | 1.000  |
|         |            | SR  | 126            | 2              | 0              | 0.0078 | 1.000  |
|         | rs3796403  |     | <b>AA</b>      | <b>GA</b>      | <b>GG</b>      |        |        |
|         |            | SS  | 9              | 16             | 5              | 0.4333 | 0.6377 |
|         |            | SR  | 38             | 69             | 18             | 0.4200 | 0.137  |
|         | rs11545013 |     | <b>CC</b>      | <b>AC</b>      | <b>AA</b>      |        |        |
|         | SS         | 30  | 0              | 0              | 0.000          | 1.000  |        |
|         | SR         | 127 | 1              | 0              | 0.0039         | 1.000  |        |
| SLC4A5  | rs7571842  |     | <b>AA</b>      | <b>GA</b>      | <b>GG</b>      |        |        |
|         |            | SS  | 18             | 11             | 2              | 0.2419 | 1.000  |
|         |            | SR  | 30             | 65             | 34             | 0.5155 | 0.9211 |
|         | rs10177833 |     | <b>AA</b>      | <b>AC</b>      | <b>CC</b>      |        |        |
|         |            | SS  | 17             | 11             | 0              | 0.1964 | 0.5488 |
|         | SR         | 29  | 65             | 28             | 0.4959         | 0.4684 |        |
| SNX1    | rs1130604  |     | <b>CC</b>      | <b>TC</b>      | <b>TT</b>      |        |        |
|         |            | SS  | 30             | 0              | 0              | 0.000  | 1.000  |
|         |            | SR  | 127            | 3              | 0              | 0.0115 | 1.000  |
|         | rs1802376  |     | <b>GG</b>      | <b>GA</b>      | <b>AA</b>      |        |        |
|         |            | SS  | 31             | 0              | 0              | 0.000  | 1.000  |
|         |            | SR  | 125            | 4              | 0              | 0.0155 | 1.000  |
|         | rs34910981 |     | <b>del del</b> | <b>ins del</b> | <b>ins ins</b> |        |        |
|         | SS         | 28  | 2              | 0              | 0.0333         | 1.000  |        |
|         | SR         | 125 | 2              | 0              | 0.0079         | 1.000  |        |
| SNX5    | rs6045116  |     | <b>GG</b>      | <b>GA</b>      | <b>AA</b>      |        |        |
|         |            | SS  | 30             | 0              | 0              | 0.000  | 1.000  |
|         |            | SR  | 126            | 1              | 0              | 0.0039 | 1.000  |
| SNX19   | rs3751037  |     | <b>GG</b>      | <b>GC</b>      | <b>GG</b>      |        |        |
|         |            | SS  | 28             | 2              | 0              | 0.0333 | 1.000  |
|         |            | SR  | 125            | 2              | 0              | 0.0079 | 0.779  |
|         | rs3190345  |     | <b>AA</b>      | <b>GA</b>      | <b>GG</b>      |        |        |
|         |            | SS  | 17             | 9              | 5              | 0.3065 | 0.0922 |
|         | SR         | 77  | 41             | 10             | 0.2383         | 0.1833 |        |

|  |           |    |           |           |           |        |        |
|--|-----------|----|-----------|-----------|-----------|--------|--------|
|  | rs681982  |    | <b>AA</b> | <b>AC</b> | <b>CC</b> |        |        |
|  |           | SS | 28        | 1         | 0         | 0.0172 | 1.000  |
|  |           | SR | 124       | 3         | 0         | 0.0118 | 1.000  |
|  | rs4414223 |    | <b>CC</b> | <b>TC</b> | <b>TT</b> |        |        |
|  |           | SS | 13        | 11        | 3         | 0.3148 | 1.000  |
|  |           | SR | 44        | 59        | 14        | 0.3718 | 0.3897 |
|  | rs2298566 |    | <b>AA</b> | <b>AC</b> | <b>CC</b> |        |        |
|  |           | SS | 16        | 12        | 1         | 0.2414 | 1.000  |
|  |           | SR | 59        | 57        | 7         | 0.2886 | 0.154  |
